# Supplementary material
Source: HighWire-hosted journal article supplement (http://www.qdcxjkg.com/highwire/filestream/113841/field_highwire_adjunct_files/0/ERJ-00515-2012_Disclosures.pdf)
Supplement: ERJ-00515-2012_Disclosures.pdf [file ERJ-00515-2012_Disclosures.pdf]

**M. de Bruijne** has received unconditional research funding from AstraZeneca R&D.

**H.A. Tiddens.** The “BV Kindergeneeskunde” of the Erasmus MC - Sophia Children’s Hospital has, in the past 3 years, received unconditional research grants from Novartis and Roche. H. Tiddens has received honoraria and travel expenses for lectures and participation in expert panels from Novartis, Gilead, Roche, Inspire, Pharmaxis, Inmed, and Bayer.
